# Supplementary material for: Characterization of a Novel Porin-Like Protein, ExtI, from Geobacter sulfurreducens and Its Implication in the Reduction of Selenite and Tellurite
Source: PubMed Central journal article supplement (PMC5877670; doi:10.3390/ijms19030809), 2018-03-11
Supplement: ijms-19-00809-s001.pdf [file ijms-19-00809-s001.pdf]

## 1 Supplementary Materials

### 2 Supplementary Table S1. Primers used in this study

| Number | Primer name          | Sequence (5' – 3')                                       |
|--------|----------------------|----------------------------------------------------------|
| #1     | Up-Fwd               | ACCATCAGCACCCACGATCTTGCCCAGCGG                           |
| #2     | Up-Rev               | CTGGTATGCCAAGGCCGGTTACATGCTCCC                           |
| #3     | Down-Fwd             | ACTCCGAGGGTACCCACGTTGGGATCTTCG                           |
| #4     | Down-Rev             | TCGTGCGCCTTTCACCTCGACAATGGTCGGC                          |
| #5     | Km <sup>r</sup> -Fwd | CGAAGATCCCAACGTGGGTACCCTCGGAGTGGATGAATGTCAGC<br>TAC      |
| #6     | Km <sup>r</sup> -Rev | GGGAGCATGTAACCGGCCTTGGCATAACCAGAGAAGGCCGGCGGT<br>GGAATCG |
| #7     | Del_check_Fwd        | CTTGACGGCATCGCCTACTACAACCTCCAAC                          |
| #8     | Del_check_Rev        | CGATGCAGGAGCTGGAATCATAACATCTTTG                          |
| #9     | GSU2939_F            | TCGATCCCCGAGAAGGATTAC                                    |
| #10    | GSU2939_R            | TGTCCACATTGGTGGATACG                                     |
| #11    | GSU2937_F            | GAGAAAAACGGCTGGTATGC                                     |
| #12    | GSU2937_R            | TGATGAACGTGGTGAAGTCC                                     |
| #13    | 16S RNA_F            | TGAGACACGGTCCAGACTCCTAC                                  |
| #14    | 16S RNA_R            | TCATTTCTCCCTCCCGACA                                      |
| #15    | GSU2935_F            | AATGCTACGGCTGTCATACGAAATA                                |
| #16    | GSU2935_R            | TTTCCCCTTGAAGGTAGAGACGTAG                                |
| #17    | GSU2934_F            | CCAGTTCATCCTTTACCATTTCGGATTT                             |
| #18    | GSU2934_R            | GGTCCCAGAAGGAATCGAGAGAAAG                                |

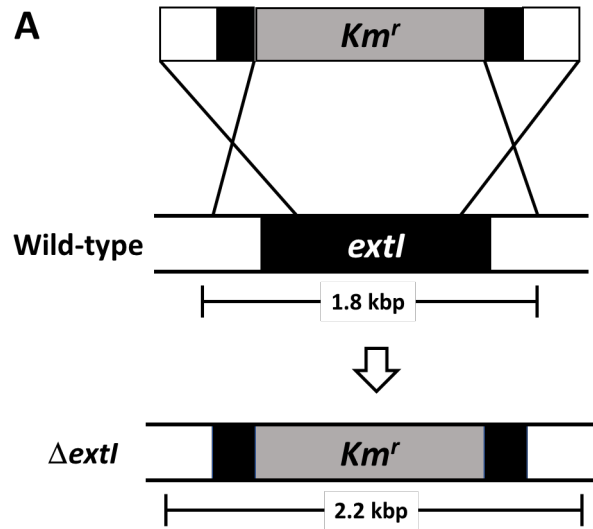

4

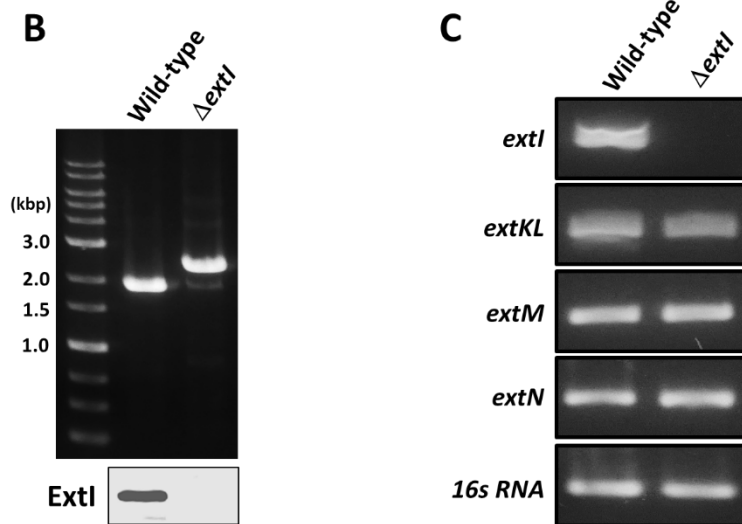

5

**Supplementary Figure S1.** Construction of an *extI*-deletion mutant ( $\Delta extI$ ). (A) Homologous recombination scheme for gene disruption. The *extI* gene was disrupted with a kanamycin resistance gene ( $Km^r$ ) in wild-type *G. sulfurreducens* as described in the *Materials and Methods*. (B) The knockout mutation in the genome was confirmed by PCR (upper panel) using the genomic DNA and primers #7 and #8 shown in Supplementary Table S1 and Western blotting (lower panel) using an ExtI-specific antibody. (C) The mRNA levels of *extI*, *extKL*, *extM*, *extN*, and *16S rRNA* in the wild-type and the  $\Delta extI$  strains were analyzed by semi-quantitative RT-PCR using each primer set shown in Supplementary Table S1.

13

14

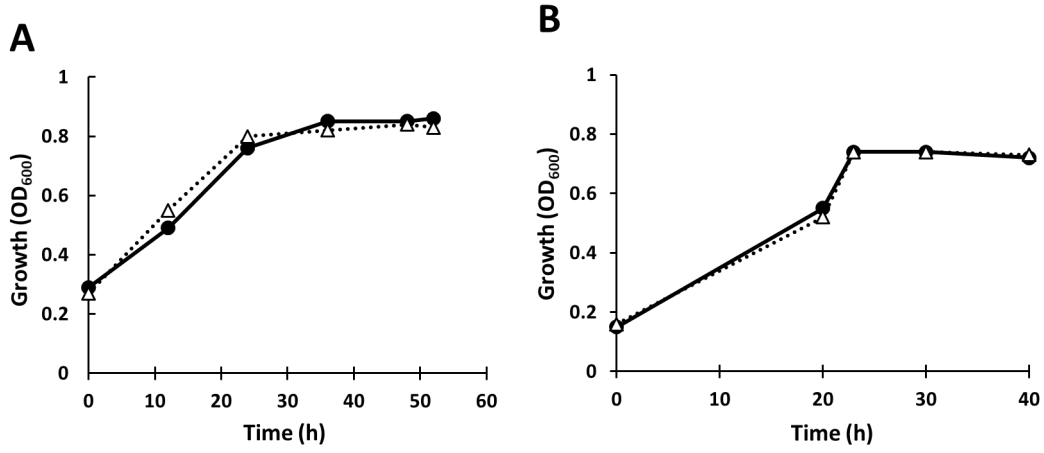

16

17

18

19

20

21

22

23

24

**Supplementary Figure S2.** Effect of *extI* deficiency on cell growth. Wild-type (circle and solid line) and  $\Delta extI$  (triangle and dotted line) were anaerobically cultured in (A) NBAFYE medium containing 40 mM fumarate and (B) FWA medium containing 20 mM fumarate. Growth was measured by determining the optical density at 600 nm (OD<sub>600</sub>).

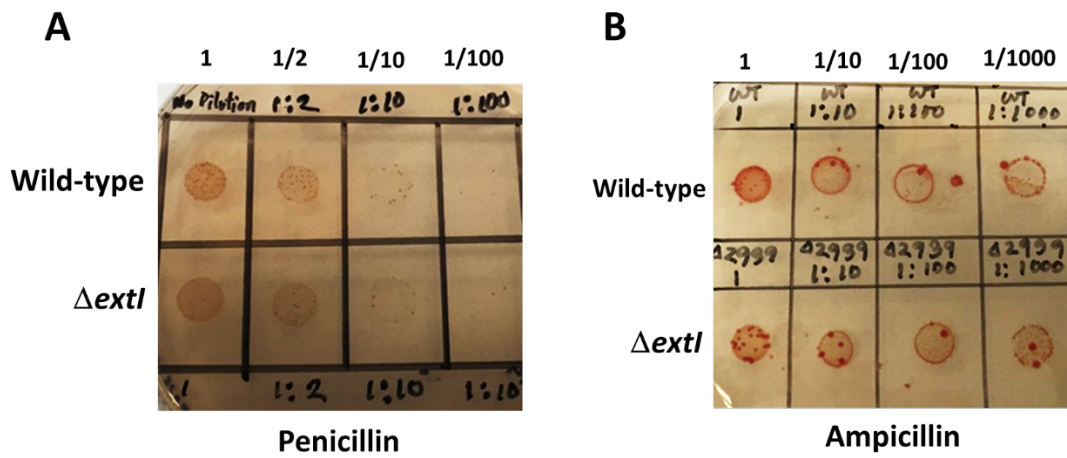

25

26 **Supplementary Figure S3.** Antibiotic susceptibility and permeability assay. Wild-type and  $\Delta extI$  were  
 27 anaerobically cultured in NBAFYE medium, and cells were diluted with saline and spotted onto the  
 28 NBAFYE agar plate containing 1.25  $\mu\text{g/mL}$  of (A) penicillin and (B) ampicillin and then cultured for 3  
 29 days.

30
